## **3D association of ER, PR and Her2 at protein levels to aid sub-grouping of breast cancer patients in routine clinical practice**

Running title: Quantification of biomarkers in FFPE specimens with QDB

Jiahong Lv<sup>1\*</sup>, Guohua Yu<sup>2,\*</sup>, Lei Li<sup>3,\*</sup>, Yunyun Zhang<sup>1,\*</sup>, Wenfeng Zhang<sup>1</sup>, Yan Lv<sup>1</sup>, Jiandi Zhang<sup>1,4,#</sup> & Fangrong Tang<sup>1</sup>

1. Yantai Quantcision Diagnostics, Inc, a division of Quantcision Diagnostics, Inc at RTP, NC, USA. Yantai, P. R. China.
  2. Dept. of Molecular Pathology, Yuhuangding Hospital, affiliated Qingdao University, Yantai, P. R. China.
  3. Dept. of Pathology, Xintai People's Hospital, Xintai, P. R. China
  4. Center for Precision Medicine, Binzhou Medical University, Yantai, P. R. China.
- \*. These authors contribute equally to this work.  
#: Corresponding author, Email: Jiandi.zhang@outlook.com; Tel: 240-644-4229.

## Abstract

1 Treatments of patients with solid tumors frequently rely on the relative and semi-  
2 quantitative assessment of tissue protein biomarkers by immunohistochemistry (IHC).  
3 The perspective of transition to absolute and quantitative assessment of tissue  
4 biomarkers is hindered by lack of a suitable method, especially for Formalin Fixed Paraffin  
5 Embedded (FFPE) tissues. In this study, we explored the feasibility of Quantitative Dot  
6 Blot (QDB) method as a universal platform to quantitate tissue biomarkers as absolute  
7 and continuous variables in FFPE samples by measuring unprecedentedly the protein  
8 levels of Estrogen Receptor (ER), Progesterone Receptor (PR), Her2 and Ki67  
9 simultaneously in 1048 FFPE samples. When using measured Her2, ER and PR levels  
10 as coordinates to develop 3D scatterplot, we observed a distinct distribution pattern of the  
11 samples with natural segregation of three groups as the likely phenotypical projection of  
12 known intrinsic subtypes. Thus, we have achieved a major milestone in this transition by  
13 identifying the first practice method for daily clinical practice, and one clinical usage in 3D  
14 subtyping of samples for prediction and prognosis. This study may serve as basis for a  
15 new field of Quantitative Diagnosis where diagnosis, prognosis and prediction are derived  
16 from database analysis of protein biomarkers as absolute and continuous variables.

17 **Key words:** QDB; 3D; biomarker; absolute; continuous variables; spatial relationship;  
18 breast cancer.

19 As an integral part of clinical diagnosis, immunohistochemistry analysis (IHC) provides  
20 valuable information about the localization of biomarkers. Yet, to rely on this method to  
21 accurately assess the quantity of tissue biomarkers is technically challenging due to its  
22 relative and semi-quantitative nature, let alone other issues including the inherent  
23 subjectivity, inconsistency and inter-observer variations. The limitations of IHC method  
24 may be used to explain the discordance between microarray-based intrinsic subtyping  
25 and IHC-based surrogate assay of breast cancer patients in clinical practice<sup>1-3</sup>.

26 Hundreds of genes were analyzed in initial microarray analysis of breast cancer tissues  
27 to reveal four intrinsic subtypes of breast cancers, including Luminal, Erb2 (Her2 type),  
28 basal-like and normal-like (intrinsic subtyping)<sup>4,5</sup>. However, later microarray studies  
29 suggested that a few gene modules including ER and Her2 modules may be sufficient for  
30 subtyping of breast cancer patients<sup>6-9</sup>. While microarray analysis is limited to  
31 retrospective studies only, surrogate assay was developed in clinical practice. This assay  
32 was based on the IHC analysis of four protein biomarkers of Estrogen receptor (ER),  
33 Progesterone receptor (PR), Ki67 and Her2 to achieve fair but unsatisfactory  
34 concordance with intrinsic subtyping<sup>1-3,10</sup>.

35 Based on these studies, we hypothesized that the intrinsic subtypes of breast cancer  
36 patients are ultimately defined by the quantitative protein levels of ER, PR and Her2. The  
37 expression levels of multiple genes in the microarray studies<sup>4-8</sup> may be combined as a  
38 quantitative gauge to indirectly reflect the protein levels of ER, PR and Her2, and should  
39 be dispensable once the protein levels of these biomarkers are measured quantitatively.

40 The IHC-based surrogate assay is obviously insufficient in this aspect by its dichotomous  
41 classification of protein biomarkers<sup>3-5</sup>. Indeed, studies based on Selected Reaction  
42 Monitoring Mass Spectrometry (SRM-MS), the only available method for absolute  
43 quantitation of tissue biomarkers in Formalin Fixed Paraffin Embedded (FFPE) samples,  
44 showed repeatedly that when Her2 levels were quantitatively measured, there existed as  
45 much as over 100 fold variations among those FFPE specimens that tested Her2 positive  
46 by IHC and/or FISH analysis<sup>11-15</sup>.

47 Recently, a high throughput immunoblot method, Quantitative Dot Blot analysis (QDB),  
48 was developed in the company<sup>16,17</sup>. This method provides a feasible alternative for  
49 absolute quantitation of tissue biomarkers in FFPE samples to SRM-MS method, which  
50 so far is limited to only a few proteins<sup>11-13,15</sup>. We explored QDB method as a universal  
51 platform to develop assays using a group of clinically validated antibodies for IHC analysis  
52 (IVD or ASR antibody), so that we could test our hypothesis with FFPE samples.

53 We measured ER, PR, Her2 and Ki67 levels as absolute and continuous variables in  
54 1048 FFPE samples using QDB-based assays (Extended data 1). In this retrospective  
55 study, all the samples were collected sequentially and nonselectively as 2X15  $\mu$ m FFPE  
56 slices from local hospitals. These samples were used for preparation of total tissue  
57 lysates by deparaffinization and solubilization with lysis buffer. All four biomarkers were  
58 measured using the same lysate prepared from 1048 FFPE samples, with intra and inter-  
59 CVs below 15% when measured three times, each time in triplicate. To ensure the  
60 consistency of the method, the absolute levels of both Her2 and Ki67 of the first 332  
61 samples were measured with two IHC antibodies independently. The correlations of the

62 measured results were all above 0.96 when analyzed with Pearson's correlation analysis  
63 (Extended Data 2a-b).

64 The distribution of all four biomarkers were shown in Fig 1a-1d. The correlations of QDB  
65 results with provided IHC results were shown in Fig 1e-1h. Our results were found to be  
66 highly correlated with IHC results for Her2 ( $\rho=0.58$ ,  $p<0.0001$ ), ER ( $\rho=0.60$ ,  $p<0.0001$ ),  
67 PR ( $\rho=0.63$ ,  $p<0.0001$ ), and Ki67 ( $\rho=0.54$ ,  $p<0.0001$ ) when analyzed with Spearman's  
68 rank correlation analysis. In addition, for ER, PR, and Ki67, when sub-grouping the  
69 samples based on their respective IHC scores, the correlations between the sub-group  
70 averages of QDB levels and IHC scores increased significantly to  $r=0.80$  for ER,  $r=0.60$   
71 for PR, and  $r=0.91$  for Ki67 with Pearson's correlation analysis. We also observed highly  
72 similar patterns as reported previously when plotting ER or PR with Her2 as absolute and  
73 continuous variables <sup>18</sup> (Extended Data 3)

74 The putative relationships among ER, PR and Her2 were investigated by constructing a  
75 three-dimensional scatterplot using their protein levels as X, Y and Z coordinates (Fig.  
76 2a). Considering the tissue heterogeneity of breast cancer, it should be emphasized that  
77 this relationship is only valid when all the biomarkers are measured from the same lysate.

78 We observed a pattern we called "balls falling from the ceiling corner", with three  
79 distinctive sub-groups appearing based on the spatial distributions of the samples. We  
80 named the first group of samples Hormone receptor (HR) group as they spread flat on  
81 the ER-PR plane, representing samples with dominant expression of hormone receptors  
82 and minimum Her2 expression. The second group were named Her2 group as they were  
83 found wrapping on the Her2 axis, representing samples with strong Her2 expression and

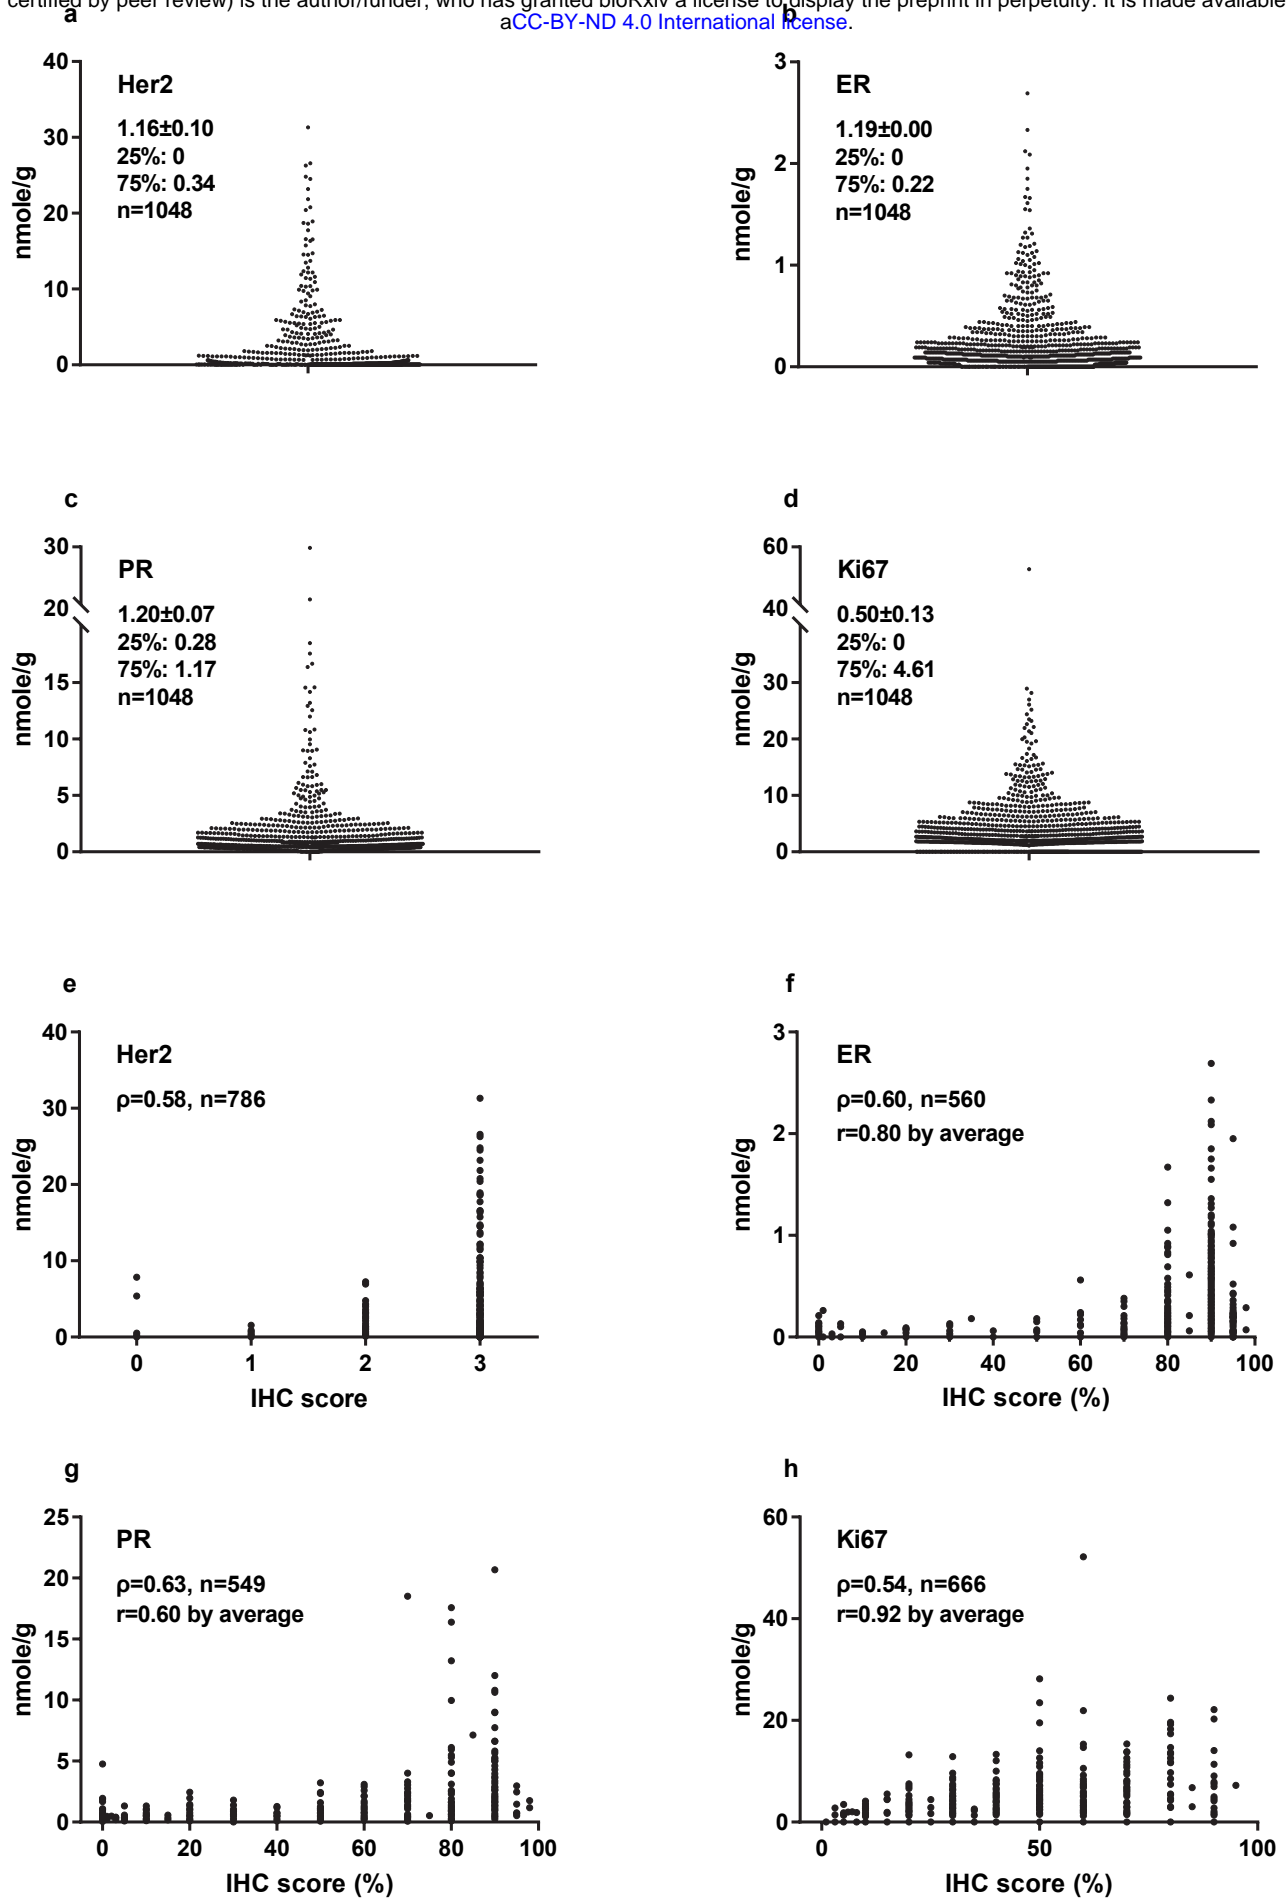

**Fig. 1. Distribution of Her2, Estrogen receptor (ER), Progesterone receptor (PR) and Ki67 levels as absolute and continuous variables among 1048 breast cancer FFPE samples (1a-1d), and their correlations with IHC scores provided by local hospitals (1e-1h).** 1a-1d: The absolute and quantitative levels of Her2, ER, PR, and Ki67 were measured with Quantitative Dot Blot (QDB) method using lysates prepared from 2X15  $\mu$ m FFPE slices. The average levels of these biomarkers were expressed as mean  $\pm$  SEM. The 25th and 75th percentiles were also listed for each biomarker respectively. The results were reported as the average of three independent measurements of these four biomarkers, with each measurement in triplicate. 1e-1h: The correlations between QDB and IHC results were analyzed among those samples with available IHC scores using Spearman's rank correlation analysis with  $p < 0.0001$  for all analysis. For ER, PR and Ki67, these samples were sub-grouped based on their IHC scores, and correlation of their subgroup averages with the matching IHC scores were analyzed again with Pearson's correlation analysis.

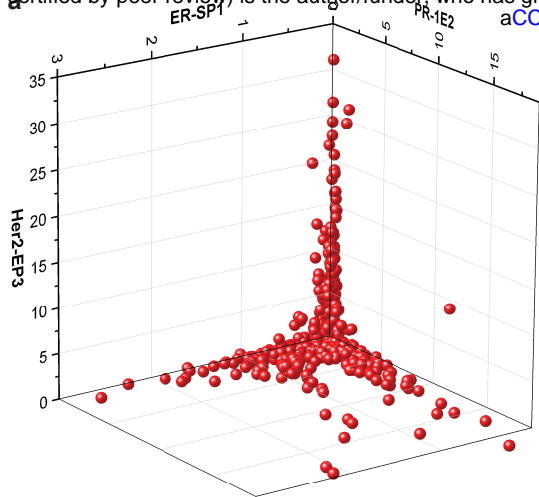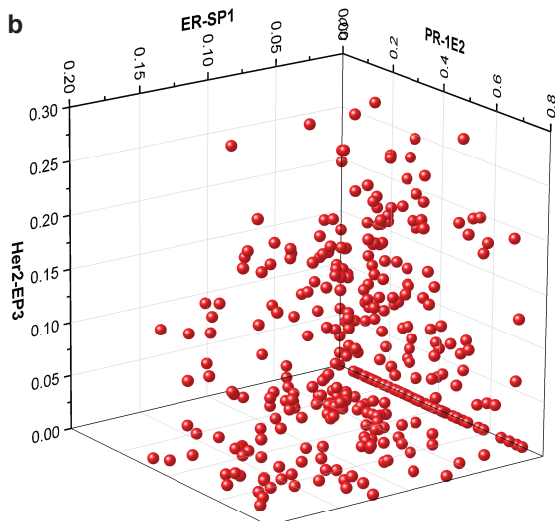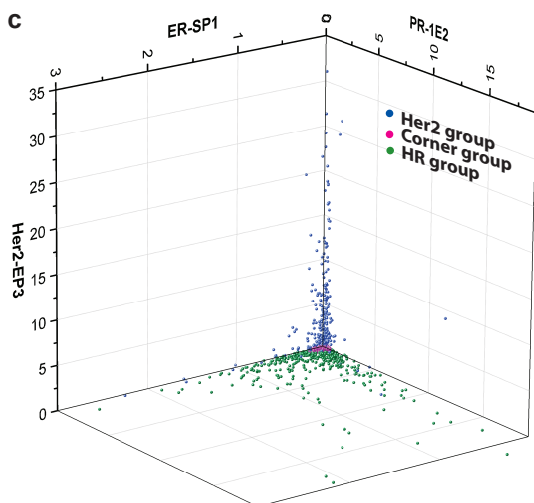

**Fig. 2: Three-dimensional distribution of 1048 FFPE samples based on the absolute and quantitative levels of ER, PR and Her2.** (a) The three-dimensional scatterplot using absolute and quantitative ER, PR and Her2 levels as X, Y and Z axes was created with Origin 9.1 software. Samples were segregated into three groups to resemble a “ball falling from ceiling corner” model as described in the text. (b) The 3D distribution of the samples was narrowed down constantly into a small block with  $ER < 0.2$  nmole/g,  $PR < 0.8$  nmole/g and  $Her2 < 0.3$  nmole/g where the samples were found distributed randomly inside. (c) Illustration of HR, Her2 and Corner groups by color in 3D scatterplot.



84 minimum hormone receptors expression. The third group accumulated at the  
85 intersections of ER, PR and Her2 axes, representing samples lacking strong expressions  
86 of ER, PR and Her2. We named this group the corner group. Few samples were found  
87 floating in the ER-PR-Her2 space, indicating the lack of samples that strongly expressed  
88 all three biomarkers of ER, PR and Her2.

89 The “balls falling from the ceiling corner” pattern persisted until we narrowed the view into  
90 a small block of ER <0.2 nmole/g, PR <0.8 nmole/g and Her2 <0.3 nmole/g, where we  
91 began to find samples distributed randomly inside (Fig 2b). Therefore, we used these  
92 values as cutoffs to separate samples as inside/outside the range with  
93 756(72.1%)/292(27.9%) for ER; 688(65.7%)/ 359(34.3%) for PR and  
94 777(74.2%)/271(25.8%) for Her2. Consequently, we were able to assign 412 samples  
95 into HR group (39.4% of total 1048 samples, including 168 samples with both ER and PR  
96 outside of the range), 271 into Her2 group (25.8%), and 365 into corner group (34.8%).

97 Interestingly, we identified 211 out of 271 (77.9%) samples from Her2 group within both  
98 the ER and PR ranges. For the remaining 60 samples, 49 out of 60 (83.3%) were within  
99 either the ER or PR range. In other words, we were able to identify 260 out of 271 (96.3%)  
100 in the Her2 group by limiting either ER <0.2 nmole/g or PR <0.8 nmole/g. Among the 11  
101 outliers, 8 samples were at the vicinity of ER or PR cutoffs. The only three exceptions  
102 were with their Her2, ER and PR levels at (3.57, 0.45, 1.13), (1.74, 0.69, 0.97) and (0.42,  
103 0.40, 1.19). These samples were also the only ones with medium to strong expressions  
104 of all three biomarkers, in agreement with our observations of few samples floating in the  
105 ER-PR-Her2 space.

106 The Ki67 levels of these three groups were evaluated in Fig.3a. We found the averaged  
107 Ki67 levels were  $3.80\pm 6.17$  nmole/g,  $4.28\pm 3.80$  nmole/g, and  $2.84\pm 3.10$  nmole/g for  
108 Corner, Her2 and HR groups respectively. There were statistical differences between  
109 corner group and HR group ( $p=0.0058$ ), between Her2 group and HR group ( $p<0.0001$ ),  
110 but not between corner group and Her2 group when Ki67 levels were analyzed with  
111 unpaired student t-test. The corner group was also the most heterogeneous group  
112 concerning Ki67 levels. Its median level was the lowest among the three groups ( $1.71$   
113 vs  $3.03$  for Her2 group and  $2.08$  for HR group), yet the top 1% of samples by Ki67  
114 expression were all within this group.

115 When observing the 3D scatterplots of ER-Her2-Ki67 (Fig 3b), ER-PR-Ki67 and PR-Her2-  
116 Ki67 together (Extended Data 4a & b), we found that samples with highest Ki67 levels  
117 were at the intersection of ER, PR and Her2. We managed to include PR information in  
118 the 3D scatterplot of ER-Her2-Ki67 by assigning samples with  $PR < 0.8$  nmole/g as red,  
119 and  $PR \geq 0.8$  nmole/g as blue in Fig. 3b. Samples with highest Ki67 levels were found  
120 exclusively in red in this picture. In addition, samples within the top 10th percentile by  
121 Ki67 levels were either within the ER and/or PR range (91%), or at the vicinity of these  
122 cutoffs (9%).

123 The clinical relevance of the suggested block of  $ER < 0.2$  nmole/g,  $PR < 0.8$  nmole/g and  
124  $Her2 < 0.3$  nmole/g was explored next. We hypothesized that these cutoffs might  
125 correspond to the cutoff values to differentiate negative samples from positive ones in  
126 clinical practice. For this purpose, the recommendations from ASCO/CAP were followed  
127 to differentiate samples into Her2+ from Her2- based on IHC results, and Receiving  
128 Operative Characteristic (ROC) analysis was performed with measured Her2 levels. As

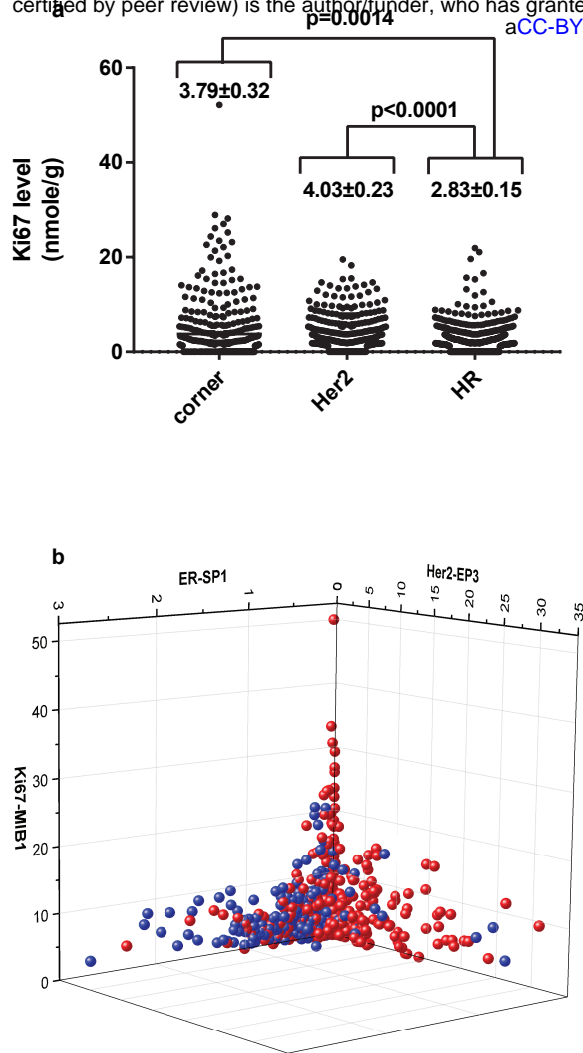

**Fig. 3: Evaluation of Ki67 levels of samples grouped by their spatial distribution.** (a) Comparison of Ki67 levels among three spatial groups of HR, Her2 and Corner groups. The absolute and quantitative Ki67 levels of all 1048 samples were measured with QDB method using the same lysates for ER, PR, and Her2 measurements. The samples were grouped into HR, Her2 and Corner groups based on the observed cutoffs at Fig. 2b (Her2 group, Her2 $\geq$ 0.3 nmole/g; HR group, ER $\geq$ 0.2 nmole/g and/or PR $\geq$ 0.8 nmole/g; corner group, ER $<$ 0.2 nmole/g, & PR $<$ 0.8 nmole/g & Her2 $<$ 0.3 nmole/g). The results were analyzed using unpaired two-tailed student t-test. (b) The spatial distribution of samples using ER, Her2 and Ki67 levels as X, Y and Z axes. Those samples with PR level  $<$ 0.8 nmole/g were arbitrarily set to the color red, while those with PR level  $\geq$ 0.8 nmole/g were set to the color blue. We observed that those samples with the highest Ki67 levels were exclusively red around the intersection of ER and Her2, suggesting a lack of ER, PR, and Her2 expression.

129 expected, we confirmed Her2 at 0.3 nmole/g as the optimized cutoff value to achieve the  
130 best sensitivity and specificity at 84.8% and 97.6% respectively with IHC results, with  
131 overall concordance rate at 93.6% with IHC analysis (Fig. 4a & 4b).

132 However, when using the recommended IHC score at 1% by ASCO/CAP as cutoff to  
133 differentiate ER and PR into negative and positive groups, we achieved better sensitivity  
134 and specificity using 0.045 nmole/g and 0.47 nmole/g as cutoffs for ER and PR than the  
135 observed 0.2 nmole/g and 0.8 nmole/g for ER and PR (data not shown). Yet, we failed  
136 to observe any distributional differences graphically around these optimized cutoff values  
137 in the 3D scatterplot. In addition, the proposed 1% as cutoff value for IHC analysis of  
138 ER positivity is not without dispute<sup>19</sup>. In ELISA analysis, the FDA-approved cutoff value  
139 for ER is at 0.15 nmole/g<sup>20</sup>.

140 The natural segregation of breast cancer samples in 3D scatterplot supports our  
141 hypothesis that the intrinsic subtyping of breast cancer patients may be determined by  
142 the quantitated protein levels of ER, PR and Her2. Admittedly, we are still unclear about  
143 how each intrinsic type is projected in this 3D plot. Future comparative studies with frozen  
144 tissues are needed to answer these questions. Nonetheless, our results signaled the  
145 need for the transition to absolute quantitation of tissue biomarkers in clinical diagnosis.

146 In addition, we may also identify a novel predictor model with the 3D relationship among  
147 biomarkers at protein level (3D subtyping). Considering biological functions are mainly  
148 carried out at protein level, 3D subtyping should offer a unique clinical benefit over those  
149 at genetic level. In addition, we expect the application of 3D subtyping with other cancer  
150 types in the future.

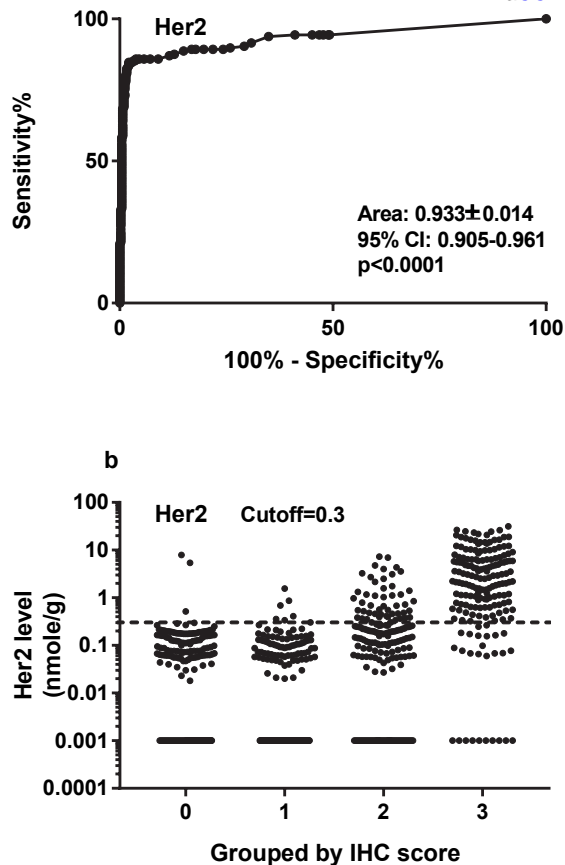

**Fig. 4: Evaluating the sensitivity and specificity of QDB method using Receiver Operative Characteristics (ROC) analysis with provided Her2 IHC scores from local hospitals.** (a) Samples with provided IHC scores were grouped as negative (IHC scores of 0 and 1+) or positive (IHC scores of 3+), and were used for Receiver Operative Characteristics (ROC) analysis using GraphPad Software. We were able to achieve Area Under the Curve (AUC) at  $0.933\pm 0.014$ , 95%CI at  $0.905\sim 0.961$  ( $p<0.0001$ ). Using 0.3 nmole/g as the cutoff, we achieved sensitivity at 84.8% and specificity at 97.6%. The concordant rate was at 93.6% (560 out of 598, samples with a Her2 score of 2+ were excluded from analysis) with IHC results. (b) To better illustrate the effectiveness of this cutoff (indicated by the dashed line) at separating negative samples from positive ones, samples were plotted in log scale and grouped based on their respective IHC scores. All those samples with their Her2 levels measured as 0 were arbitrarily set as 0.001 nmole/g to avoid being omitted in the log scale plot.

151 In summary, our results emphasized the need for a transition to absolute quantitation of  
152 tissue biomarkers by demonstrating the natural spatial sub-grouping of breast cancer  
153 patients by ER, PR and Her2 protein levels. We also demonstrated QDB to be an  
154 effective method to meet this need in daily clinical practice by adopting this method to  
155 measure ER, PR, Her2 and Ki67 in 1048 FFPE samples for the first time.

156 Our study may affect the field of clinical diagnosis in multiple aspects. First, the feasibility  
157 of QDB method with FFPE specimen allows us to access the rich reservoir of FFPE  
158 specimens worldwide to unprecedentedly generate knowledge about the clinical  
159 relevance of tissue biomarkers and their putative associations through population studies;  
160 second, it will also speed up the process of identification and verification of new  
161 biomarkers in clinical diagnosis; and third, the existence of hundreds of IVD or ASR  
162 antibodies would allow us to extend our studies to a wide spectrum of solid tumors  
163 expediently. These studies may lead to a new field of quantitative diagnosis, where the  
164 clinical decisions are made from population studies of multiple biomarkers as absolute  
165 and continuous variables.

166 .

167

## 168 **References**

- 169 1. Prat, A. & Perou, C. M. Deconstructing the molecular portraits of breast cancer. *Mol.*  
170 *Oncol.* **5**, 5–23 (2011).
- 171 2. Howlader, N. *et al.* US Incidence of Breast Cancer Subtypes Defined by Joint  
172 Hormone Receptor and HER2 Status. *JNCI J. Natl. Cancer Inst.* **106**, (2014).

- 173 3. Yersal, O. & Barutca, S. Biological subtypes of breast cancer: Prognostic and  
174 therapeutic implications. *World J. Clin. Oncol.* **5**, 412–424 (2014).
- 175 4. Perou, C. M. *et al.* Molecular portraits of human breast tumours. *Nature* **406**, 747–  
176 752 (2000).
- 177 5. Sørlie, T. *et al.* Gene expression patterns of breast carcinomas distinguish tumor  
178 subclasses with clinical implications. *Proc. Natl. Acad. Sci. U. S. A.* **98**, 10869–  
179 10874 (2001).
- 180 6. Haibe-Kains, B. *et al.* A Three-Gene Model to Robustly Identify Breast Cancer  
181 Molecular Subtypes. *JNCI J. Natl. Cancer Inst.* **104**, 311–325 (2012).
- 182 7. Kapp, A. V. *et al.* Discovery and validation of breast cancer subtypes. *BMC*  
183 *Genomics* **7**, 231 (2006).
- 184 8. Desmedt, C. *et al.* Biological Processes Associated with Breast Cancer Clinical  
185 Outcome Depend on the Molecular Subtypes. *Clin. Cancer Res.* **14**, 5158–5165  
186 (2008).
- 187 9. Prat, A., Parker, J. S., Fan, C. & Perou, C. M. PAM50 assay and the three-gene  
188 model for identifying the major and clinically relevant molecular subtypes of breast  
189 cancer. *Breast Cancer Res. Treat.* **135**, 301–306 (2012).
- 190 10. Kim, H. K. *et al.* Discordance of the PAM50 Intrinsic Subtypes Compared with IHC-  
191 Based Surrogate in Breast Cancer Patients: Potential Implication of Genomic  
192 Alterations of Discordance. *Cancer Res. Treat.* (2018). doi:10.4143/crt.2018.342
- 193 11. Steiner, C. *et al.* Quantification of HER2 by Targeted Mass Spectrometry in  
194 Formalin-Fixed Paraffin-Embedded (FFPE) Breast Cancer Tissues. *Mol. Cell.*  
195 *Proteomics* **14**, 2786–2799 (2015).

- 196 12. Nuciforo, P., Radosevic-Robin, N., Ng, T. & Scaltriti, M. Quantification of HER family  
197 receptors in breast cancer. *Breast Cancer Res.* **17**, 53 (2015).
- 198 13. Nuciforo, P. *et al.* High HER2 protein levels correlate with increased survival in  
199 breast cancer patients treated with anti-HER2 therapy. *Mol. Oncol.* **10**, 138–147  
200 (2016).
- 201 14. Catenacci, D. V. T. *et al.* Mass-spectrometry-based quantitation of Her2 in  
202 gastroesophageal tumor tissue: comparison to IHC and FISH. *Gastric Cancer* **19**,  
203 1066–1079 (2016).
- 204 15. An, E. *et al.* Quantitative proteomic analysis of HER2 expression in the selection of  
205 gastric cancer patients for trastuzumab treatment. *Ann. Oncol.* **28**, 110–115 (2017).
- 206 16. Tian, G. *et al.* Quantitative dot blot analysis (QDB), a versatile high throughput  
207 immunoblot method. *Oncotarget* **8**, 58553–58562 (2017).
- 208 17. Qi, X. *et al.* High Throughput, Absolute Determination of the Content of a Selected  
209 Protein at Tissue Levels Using Quantitative Dot Blot Analysis (QDB). *JoVE J. Vis.*  
210 *Exp.* e56885–e56885 (2018). doi:10.3791/56885
- 211 18. Konecny, G. *et al.* Quantitative association between HER-2/neu and steroid  
212 hormone receptors in hormone receptor-positive primary breast cancer. *J. Natl.*  
213 *Cancer Inst.* **95**, 142–153 (2003).
- 214 19. Yi, M. *et al.* Which threshold for ER positivity? a retrospective study based on 9639  
215 patients. *Ann. Oncol.* **25**, 1004–1011 (2014).
- 216 20. Sams, S. B. American Society of Clinical Oncology/College of American  
217 Pathologists Guideline Recommendations for Immunohistochemical Testing of



218 Estrogen and Progesterone Receptors in Breast Cancer (Unabridged Version).

219 *Yearb. Pathol. Lab. Med.* **2011**, 25–26 (2011).

220

## 221 **MATERIALS AND METHODS**

### 222 *Human subjects and human cell lines*

223 A total of 1048 Formalin Fixed Paraffin Embedded (FFPE) breast cancer tissue  
224 specimens were provided sequentially and non-selectively together with IHC scores of  
225 four biomarkers from some of the specimens from Yantai Yuhuangding Hospital, and  
226 Xintai People's Hospital from P. R. China . All the samples were obtained in accordance  
227 with the Declaration of Helsinki and approved by the Medical Ethics Committees of each  
228 institutions respectively.

229 MCF-7 and BT474 cell lysates were obtained from the Cell Bank of Chinese Academy of  
230 Sciences (Shanghai, China), and used as controls for all four biomarkers.

### 231 *General reagents*

232 Recombinant human Her-2/ErbB2 protein was purchased from Biological Inc. ER, PR  
233 and Ki67 recombinant proteins were purified in the house. QDB plate was purchased  
234 from Quanticision Diagnostics, Inc (RTP, NC, USA). Ventana anti-Her2/neu(4B5) rabbit  
235 monoclonal primary antibody and anti-PR (1E2) rabbit monoclonal primary antibody  
236 were purchased from Roche Diagnostics GmbH. Rabbit anti-ER (SP1) antibody was  
237 purchased from Abcam Inc. Rabbit anti-Her2 antibody (EP3) and mouse anti-Ki67  
238 (MIB1 & UMAB107) were purchased from ZSGB-BIO ([www.zsbio.com](http://www.zsbio.com), Beijing, China).  
239 HRP labeled Donkey Anti-Rabbit IgG secondary antibody was purchased from Jackson  
240 Immunoresearch lab (West Grove, PA, USA). BCA total protein quantification kit was  
241 purchased from Thermo Fisher Scientific Inc (Calsband, CA, USA).

242

243 *Purification of protein standards for ER, PR and Ki67*

244 DNA sequences corresponding to the 1162-1254AA of human MKI67 (NCBI #:  
245 NM\_002417.4), 455-595AA of human ER- $\alpha$  (NCBI #: NM\_000125.3), and 310-417 AA  
246 of human PR isoform B (NCBI#: NP000917.3) were inserted into pET-32a (+)  
247 expression vector respectively and expressed in E.coli BL21(DE3) competent cells.  
248 The cells were induced with 1mM IPTG, and total bacterial lysates were extracted in  
249 10ml binding buffer(20mM sodium phosphate, 500mM NaCl, 20mM imidazole, PH 7.4)  
250 before they were loaded onto a high affinity Ni<sup>2+</sup> column pre-equilibrated with 10ml  
251 binding buffer. The recombinant protein was eluted with 3ml elution buffer (20mM  
252 sodium phosphate, 500mM NaCl, 250mM imidazole, PH 7.4), and dialyzed in PBS (PH  
253 7.4) at 4°C overnight. The purity of the protein was examined by a 12% SDS-PAGE gel,  
254 and the purified protein was stored at -80°C in small aliquot with 20% glycerol.

255

256 *Preparation of FFPE tissue and cell lysates*

257 Two whole tissue slices (2X15 $\mu$ m) from FFPE blocks were put into 1.5ml Eppendorf  
258 tubes, and deparaffinized before they were solubilized using solubilization buffer(50mM  
259 Tris-HCl, 10 mM EDTA, 1% Tween 20, 10% glycerol, pH 9.9). Cells (MCF-7& BT474  
260 cells) were lysed in the lysis buffer (50mM HEPES, 137mM NaCl, 5mM EDTA, 1mM  
261 MgCl<sub>2</sub>, 10mM Na<sub>2</sub>P<sub>2</sub>O<sub>7</sub>, 1% TritonX-100, 10% glycerol, pH7.6) with protease inhibitors  
262 (2 $\mu$ g/ml Leupeptin, 2 $\mu$ g/ml Aprotinin, 1 $\mu$ g/ml pepstatin, 2mM PMSF, 2mM NaF). The  
263 supernatants were collected after centrifugation and the total amount of protein was  
264 measured using BCA protein assay kit by following manufacturer's instructions.

265

266 *QDB analysis*

267 Sample pools were prepared by mixing tissue lysates from four FFPE tissue specimens  
268 with an IHC score of 3+ for Her2, and IHC score of 90% for ER, PR and Ki67 to define  
269 the linear range of QDB assay respectively. The pooled lysates were serially diluted  
270 side by side with the recombinant proteins for defining the standard curves of QDB  
271 analysis.

272

273 The QDB process was described elsewhere with minor modifications<sup>16,17</sup>. In brief, the  
274 final concentration of the FFPE tissue lysates was adjusted to 0.25  $\mu\text{g}/\mu\text{l}$  for Her2 and  
275 Ki67 and 0.125  $\mu\text{g}/\mu\text{l}$  for ER and PR, and 2  $\mu\text{l}/\text{unit}$  was used for QDB analysis in  
276 triplicate. The QDB plate was then dried for one hour at RT, soaked in transfer buffer for  
277 10s, rinsed once with TBST, and then blocked in 4% non-fat milk for an hour. Next, it  
278 was put into a 96-well microplate with 100 $\mu\text{l}$  primary antibody (for clone EP3, 1:1500 in  
279 blocking buffer; for clone 4B5, 1:10 in PBS; for clone SP1, 1:250 in blocking buffer; for  
280 clone 1E2, 1:8 in PBS; for clone MIB-1, 1:1000 in blocking buffer)), and incubated  
281 overnight at 4°C. Afterward, the plate was rinsed twice with TBST and washed  
282 3X10mins. It was then incubated with either a donkey anti-rabbit or donkey anti-mouse  
283 secondary antibody for 4 hours at RT, rinsed twice with TBST, and washed 4X10mins.  
284 Finally, the QDB plate was inserted into a white 96-well plate pre-filled with 100 $\mu\text{l}/\text{well}$   
285 ECL working solution for 3mins. The chemiluminescence signal of the combined plate  
286 was quantified by using the Tecan Infiniti 200pro Microplate reader with the option “plate  
287 with cover”.

288

289 For the 1048 FFPE samples, each sample was measured three times, each time in  
290 triplicate. The consistency of the experiments was also ensured by including BT-474  
291 and MCF-7 cell lysates with pre-documented biomarker levels in all the experiments  
292 respectively. The result was considered valid when the calculated biomarker levels of  
293 control cells were within 10% of the pre-documented biomarker levels. The absolute  
294 biomarker levels were determined based on the dose curve of protein standard, with  
295 those samples with chemiluminescence reading of less than 2 fold over blank were  
296 defined as non-detectable, and entered as 0 for data assay.

297

### 298 *Data analysis*

299 All the data were presented as Mean±SEM. All the 3D analyses of biomarkers were  
300 performed using Origin pro 9.1 software from Originlab Corp (Northampton,  
301 Massachusetts, USA). All the statistical analyses, including the unpaired two-tailed  
302 student t test, were performed with GraphPad Prism software version 7.0 (GraphPad  
303 Software, USA). P value <0.05 was considered statistically significant.

304

### 305 *Code Availability statement*

306 Not applicable.

307

308

309

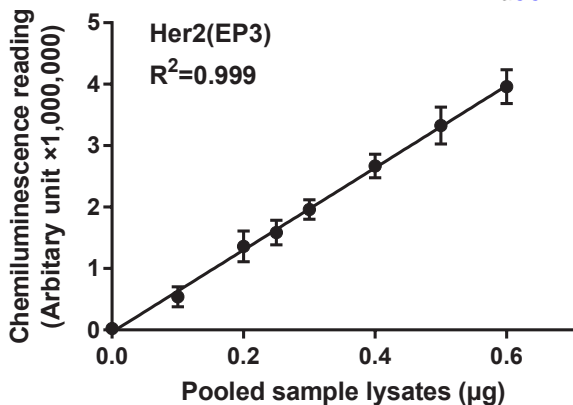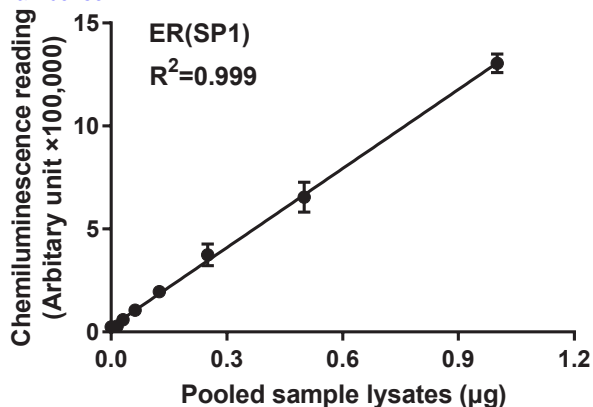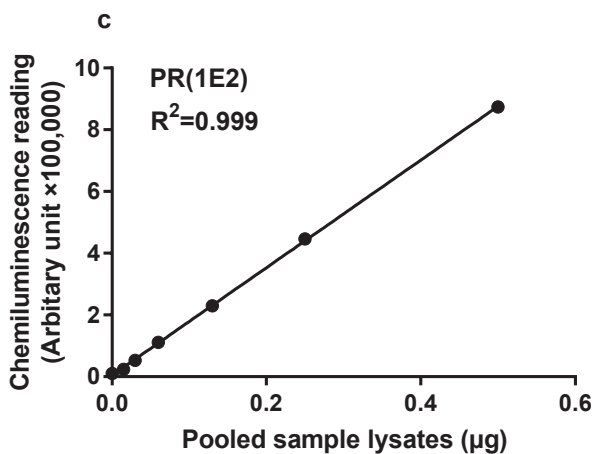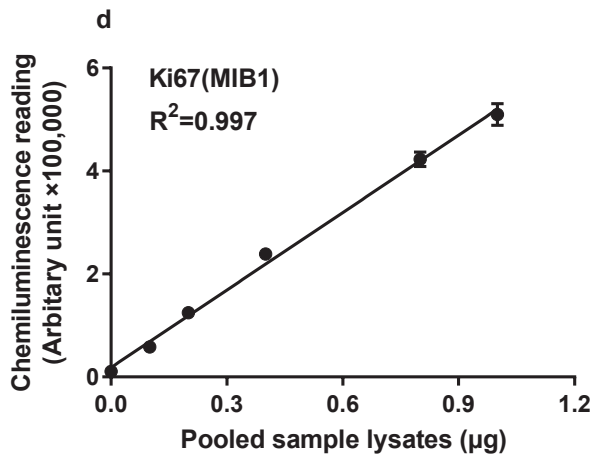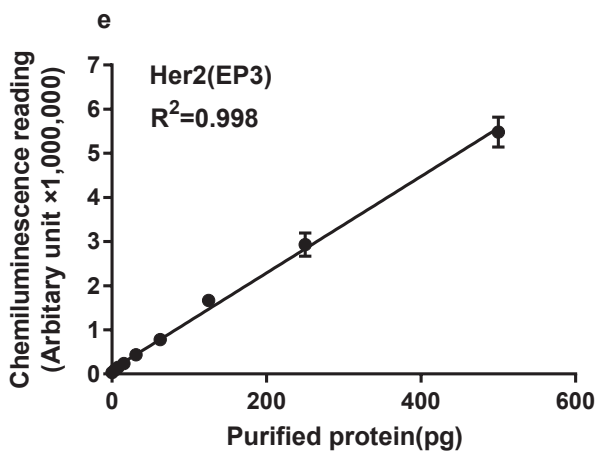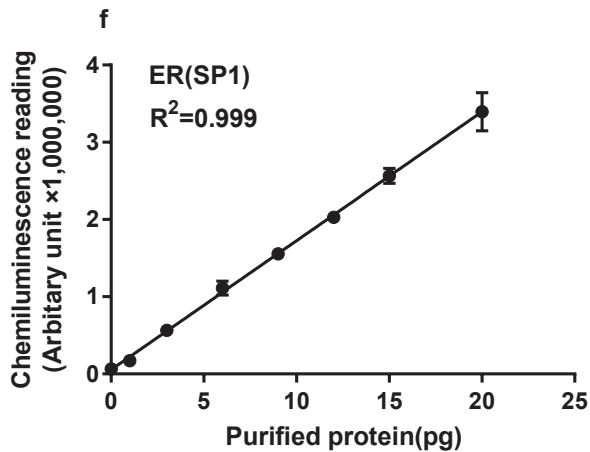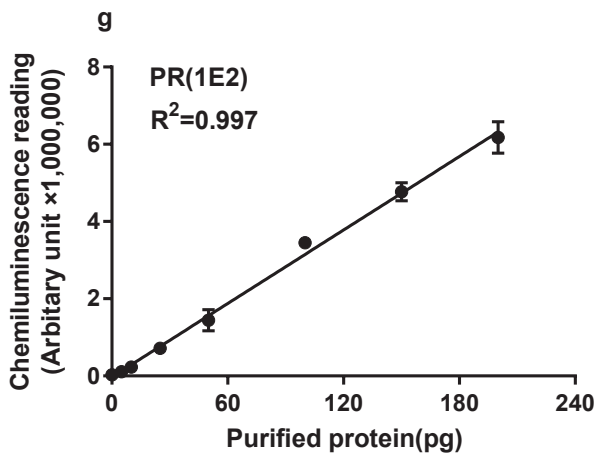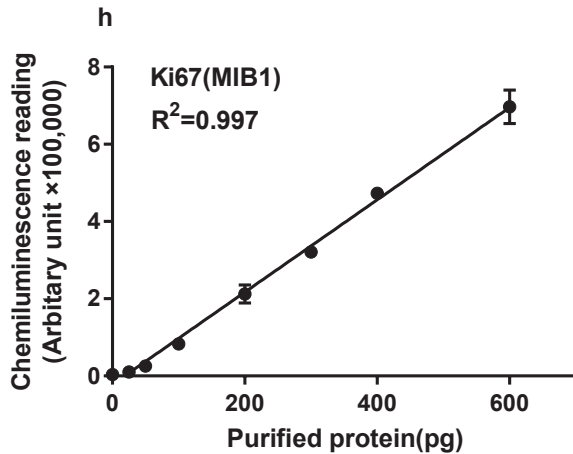

**Extended Data 1. Defining the linear ranges of QDB method for measuring Her2, Estrogen receptor (ER), Progesterone receptor (PR) and Ki67 levels using validated IHC antibodies as indicated in the figure. Fig. 1a-1d:** Pooled samples prepared from 2X15  $\mu\text{m}$  FFPE slices obtained from 4 patients testing positive based on IHC analyses of these biomarkers were used to define the linear range of QDB method for these biomarkers respectively. Pooled samples were serially diluted and supplemented with IgG-free BSA at a final amount of 0.5  $\mu\text{g}/\text{unit}$  for Her2 and Ki67, and 0.25  $\mu\text{g}/\text{unit}$  for ER and PR. The chemiluminescence signals were captured with a Tecan microplate reader, and used for linear regression analysis with the matching amount of total protein lysates used in the QDB analysis. The linear range of the analysis was defined as where the coefficient of determination ( $R^2$ ) was above 0.99. Fig. 1e-1h: Purified recombinant protein, either obtained commercially (Her2), or purified in the house (ER, PR and Ki67) were loaded at the amount indicated in the figure legends, and supplemented with IgG-free BSA to match the final loading amount for sample analysis at 0.25  $\mu\text{g}/\text{unit}$  for ER and PR, and 0.5  $\mu\text{g}/\text{unit}$  for Her2 and Ki67. The chemiluminescence signals were captured with a Tecan microplate reader, and used for linear regression analysis with the matching amount of protein standard used in the QDB analysis. The linear range of the analysis was defined as the region where the coefficient of determination ( $R^2$ ) was above 0.99.

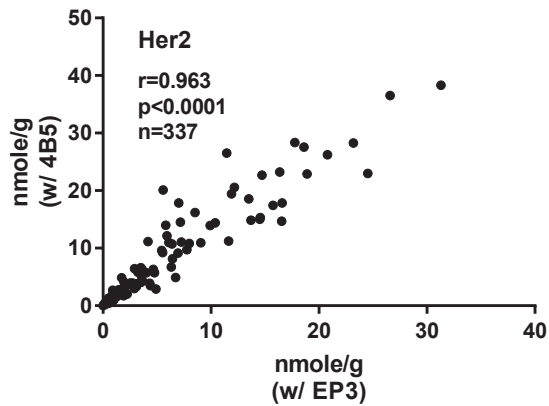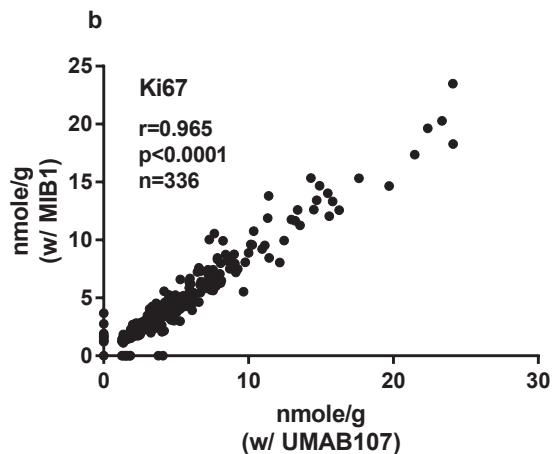

**Extended Data 2:** Consistency of the QDB measurement of Her2 (a) and Ki67 (b) levels using two independent validated IHC antibodies respectively. (a) Total lysates prepared from 2X15  $\mu\text{m}$  FFPE slices were used for QDB measurements of Her2 levels at 0.5  $\mu\text{g}$ /sample with EP3 and 4B5 antibodies respectively, as described in Materials and Methods. The correlation between Her2 levels from EP3 and 4B5 measurements were analyzed with Pearson's correlation analysis in 332 samples.  $P<0.0001$ . (b) The same lysates from (a) were also used for measurements of Ki67 levels using MIB1 and UMAB107 respectively in 332 samples. The correlation between Ki67 levels from MIB1 and UMAB107 measurements were analyzed using Pearson's correlation analysis.  $P<0.0001$ .



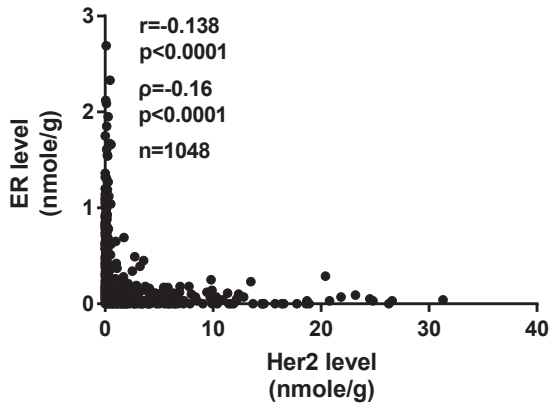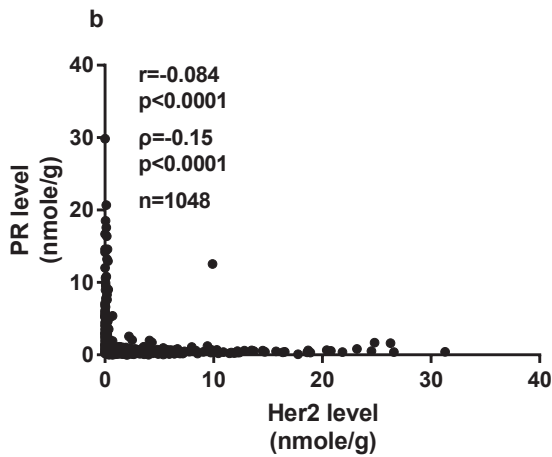

**Extended Data 3.** The relationship between Her2 and ER (a) or PR (b) by absolute and quantitative protein levels. The correlation between these factors was evaluated with both Pearson's correlation analysis and Spearman's rank correlation analysis using GraphPad Software.

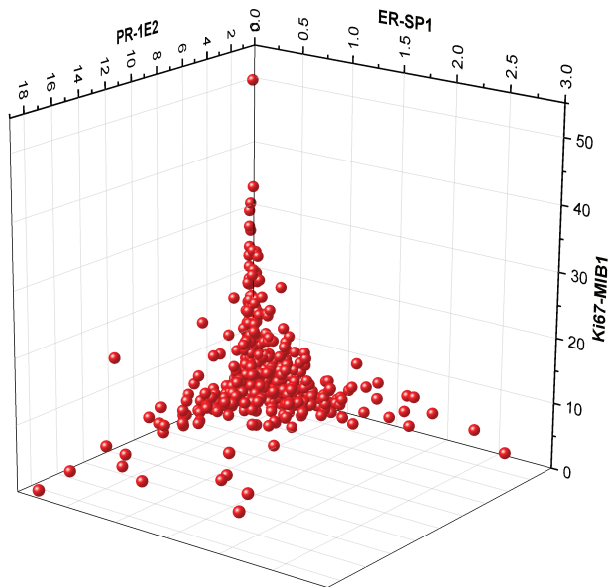

**b**

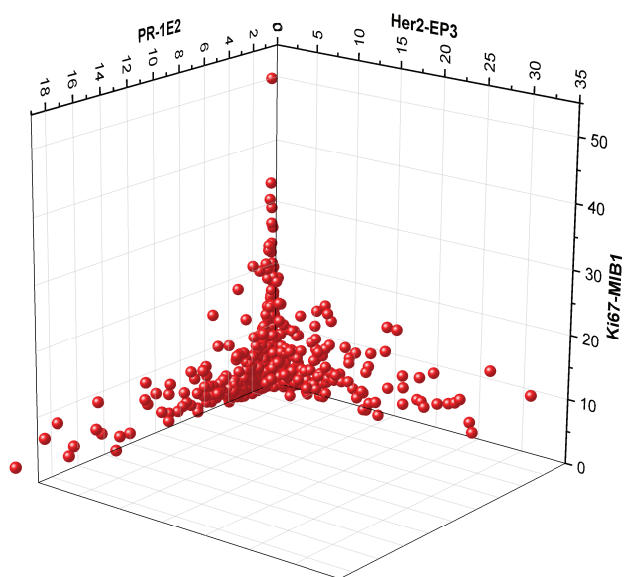

**Extended Data 4:** The three-dimensional relationships among PR, ER and Ki67 (a) and PR, Her2 and Ki67 (b) at protein level. The results were plotted in a 3D scatterplot using Origin Pro 9.1.
